# Supplementary material for: In situ spectroscopy studies of CO2 adsorption in a dually functionalized microporous metal–organic framework
Source: Royal Society of Chemistry journal article supplement (doi:10.1039/c4ta05524a), 2015-01-01
Supplement: c4ta05524a1.pdf [file c4ta05524a1.pdf]

***In situ* spectroscopy studies of CO<sub>2</sub> adsorption in a dually  
functionalized microporous metal-organic framework**

Yuan Chen,<sup>1</sup> Han Wang,<sup>2</sup> Jing Li,<sup>2</sup> and Jenny V. Lockard<sup>1</sup>

<sup>1</sup>Department of Chemistry, Rutgers University-Newark,  
Newark, New Jersey 07102, United States

<sup>2</sup>Department of Chemistry and Chemical Biology, Rutgers University-New Brunswick,  
Piscataway, New Jersey 08854, United States

**Supporting Information**

## 1. Synthesis

### Synthesis of 2,4,6-tris(3,5-dicarboxylphenylamino)-1,3,5-triazine ( $H_6$ TDPAT):

5-aminoisophthalic acid (7.6 g, 0.042 mol), NaOH (2.68 g, 0.067 mol), and  $NaHCO_3$  (4.37 g, 0.052 mol) were mixed in 70 mL  $H_2O$ . The mixture was stirred at 0 °C, during which cyanuric chloride (1.84 g, 0.01 mol) in 1,4-dioxane (35 mL) was added dropwise. The mixture was then stirred at 100 °C for 24 hours before cooling down to room temperature. The solution was adjusted to pH =2 with HCl solution and the resulting solid was collected by filtration, rinsed several times with distilled water and then hot methanol and dried to give pure  $H_6$ TDPAT (5.0 g, yield: 90%).  $^1H$  NMR ([D6] DMSO, 300 MHz):  $\delta$ =8.12 (3H), 8.47 (6H), 9.67 (3H) ppm.

### Synthesis of Cu-TDPAT (1)

$Cu(NO_3)_2 \cdot 3H_2O$  (492 mg, 2.04 mmol),  $H_6$ TDPAT (90 mg, 0.147 mmol) were dissolved in 6 mL DMA, 6 mL DMSO, 0.3 mL  $H_2O$  and 2.7 mL  $HBF_4$ . The mixture was sonicated until homogeneous solution was achieved and then sealed in a vial and heated at 85 °C for 5 days. Upon cooling to room temperature, blue crystals were collected after filtration and washing with DMA for several times. The as-made Cu-TDPAT sample was immersed in methanol for 3 days to exchange the nonvolatile solvents, during which the extract was decanted and replaced with fresh methanol every 3 hours.

## 2. Powder X-ray diffraction experiment

Powder X-ray diffraction patterns of **1** were recorded on a 2D detector at X18A of NSLS in Brookhaven National Lab. All the measurements were operated at room temperature using 10keV X-ray right after the corresponding XAFS scans.

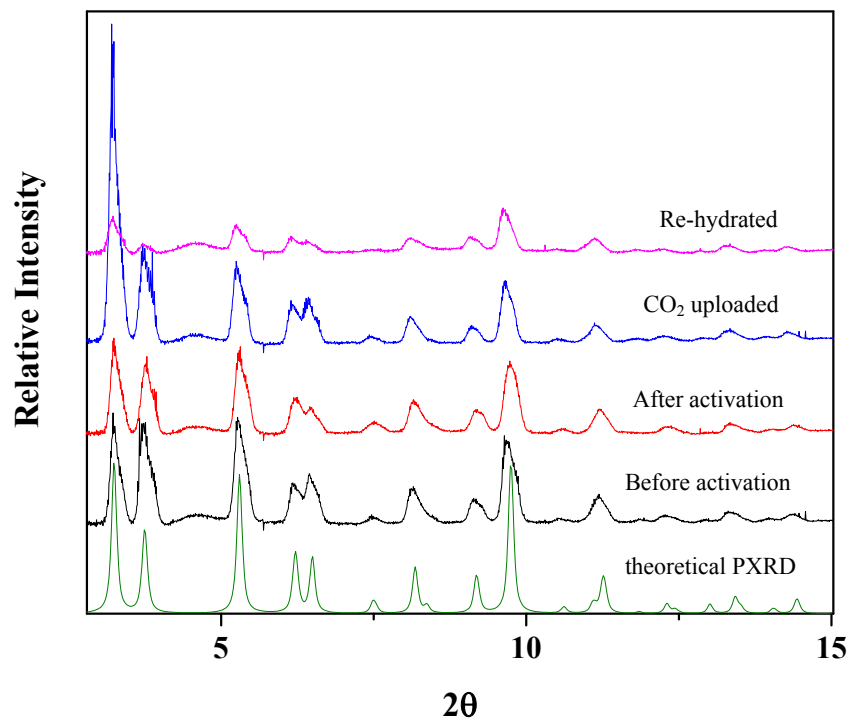

**Figure S1.** PXRD patterns of **1** before and after activation, upon CO<sub>2</sub> loading and rehydration. Bottom trace: theoretical PXRD pattern

### 3. DFT computational methods.

The geometry optimization and vibrational modes of TDPAT was calculated using the Gaussian 03 program package<sup>1</sup> at the density functional theory (DFT) level with Beck's three parameter functional and Lee-Yang-Parr functional (B3LYP) method. 6-31G basis set was used. A summary of the calculated frequencies for the most Raman active vibrational modes is provided in Table S1. The vibrational mode anharmonicities were compensated using of a scaling factor of 0.96 in reporting their frequencies.

#### 4. Reference Raman Spectra

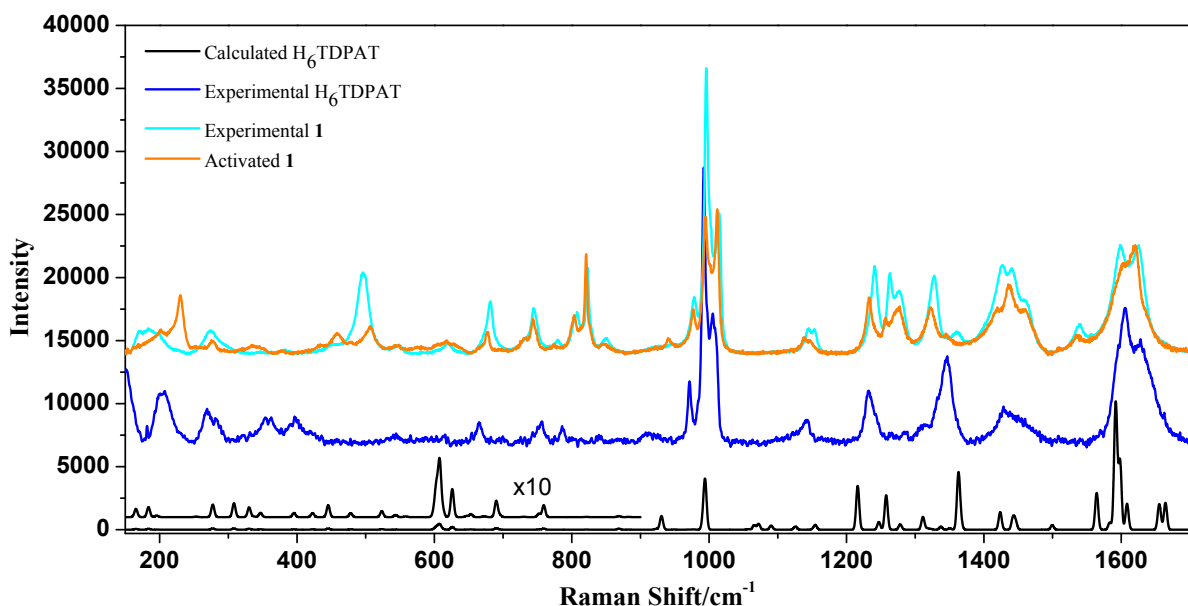

**Figure S2.** Experimental (orange) and calculated (black) Raman spectra of  $H_6TDPAT$  ligand. The calculated low frequency peaks were scaled up for better view.

**Table S1.** Experimental and calculated Raman active vibrational mode frequencies with descriptions of dominant components of the corresponding vibrational mode assignments for the  $H_6TDPAT$  ligand

| Exp. Frequency of $H_6TDPAT$ | Calc. Frequency | Raman assignment                                                      |
|------------------------------|-----------------|-----------------------------------------------------------------------|
| 199.5                        | 165             | In plane Phenyl Ring tilt                                             |
| 207.1                        | 184             | Out plane Phenyl Ring tilt                                            |
| 269.1                        | 277             | $\delta$ Phenyl Ring                                                  |
| 354.2                        | 308             | $\beta(COOH)$                                                         |
| 396.5                        | 330             | $\nu(COOH)$                                                           |
| 665.7                        | 607             | $\delta$ Phenyl Ring                                                  |
| 756.9                        | 690             | In plane $\delta$ benzene ring                                        |
| 786.0                        | 759             | $\delta$ Phenyl Ring + $\gamma(N-H)_{amine}$                          |
| 971.5                        | 931             | Triazine ring breath                                                  |
| 992.1                        | 994             | Phenyl ring breath                                                    |
| 1232.0                       | 1216            | $\nu(C-N)_{triazine}$                                                 |
| -                            | 1258            | $\nu(C-C)_{phenyl} + \nu(C-N) + \beta(C-H) + \beta(N-H) + \beta(O-H)$ |
| 1346.8                       | 1363            | $\nu(C-C)_{phenyl} + \nu(C-N) + \beta(C-H) + \beta(N-H) + \beta(O-H)$ |
| 1428.5                       | 1424            | $\nu(C-C)_{phenyl} + \nu(C-N) + \beta(C-H) + \beta(N-H)$              |
| -                            | 1443            | $\nu(C-C)_{phenyl} + \nu(C-N) + \beta(C-H) + \beta(N-H)$              |
| -                            | 1499            | $\nu(C-C)_{phenyl} + \nu(C-N) + \beta(C-H) + \beta(N-H)$              |
| 1605.3                       | 1592            | $\nu(C-C)_{phenyl}$                                                   |

|        |      |         |
|--------|------|---------|
| 1626.2 | 1608 | v(C-OH) |
|--------|------|---------|

## REFERENCES:

(1) M. J. Frisch, G. W. T., H. B. Schlegel, G. E. Scuseria, M. A. Robb, J. R. Cheeseman, G. Scalmani, V. Barone, B. Mennucci, G. A. Petersson, H. Nakatsuji, M. Caricato, X. Li, H. P. Hratchian, A. F. Izmaylov, J. Bloino, G. Zheng, J. L. Sonnenberg, M. Hada, M. Ehara, K. Toyota, R. Fukuda, J. Hasegawa, M. Ishida, T. Nakajima, Y. Honda, O. Kitao, H. Nakai, T. Vreven, J. A. Montgomery, Jr., J. E. Peralta, F. Ogliaro, M. Bearpark, J. J. Heyd, E. Brothers, K. N. Kudin, V. N. Staroverov, R. Kobayashi, J. Normand, K. Raghavachari, A. Rendell, J. C. Burant, S. S. Iyengar, J. Tomasi, M. Cossi, N. Rega, J. M. Millam, M. Klene, J. E. Knox, J. B. Cross, V. Bakken, C. Adamo, J. Jaramillo, R. Gomperts, R. E. Stratmann, O. Yazyev, A. J. Austin, R. Cammi, C. Pomelli, J. W. Ochterski, R. L. Martin, K. Morokuma, V. G. Zakrzewski, G. A. Voth, P. Salvador, J. J. Dannenberg, S. Dapprich, A. D. Daniels, Ö. Farkas, J. B. Foresman, J. V. Ortiz, J. Cioslowski, and D. J. Fox; Gaussian Inc.: Wallingford, CT, 2010.
